# Supplementary material for: Characterizing infectious disease progression through discrete states using hidden Markov models
Source: PLoS One. 2020 Nov 20;15(11):e0242683. doi: 10.1371/journal.pone.0242683 (PMC7678993; doi:10.1371/journal.pone.0242683)
Supplement: S1 File — This section contains a detailed description of the Newton-Raphson Estimation of gamma emission parameters. (DOCX) [file pone.0242683.s003.docx]

**File S1. Description of gamma parameter estimation**

Newton-Raphson Estimation of gamma emission parameters.

MAP CFU emissions were modeled with gamma distributions, with the following pdf:

And log likelihood function:

The maximum likelihood estimator for the scale parameter is , however there is no closed form maximum likelihood estimate for the shape parameter Therefore, an estimate was generated using Newton Raphson estimation. The methods of moments estimator was used as the initial estimate for

Following the initial estimation of Newton Raphson Estimation was used to iteratively calculate for each state k:

where , and .

Estimation was stopped when the value changed by less than 0.0001 or if the number of Newton-Raphson iterations exceeded 10000. If the number of iterations exceeded this threshold, the run was terminated.
