# Supplementary material for: Characterizing infectious disease progression through discrete states using hidden Markov models
Source: PLoS One. 2020 Nov 20;15(11):e0242683. doi: 10.1371/journal.pone.0242683 (PMC7678993; doi:10.1371/journal.pone.0242683)
Supplement: S2 Table — Parameter estimates for the two and three hidden disease models were generated using the modified Baum-Welch Expectation Maximization algorithm. (DOCX) [file pone.0242683.s002.docx]

S2 Table. Four and five state model parameter estimates.

| *Parameter* | *Description* | *4 state model* | *5 state model* |
| --- | --- | --- | --- |
| Four state models | | |  |
|  | Probability of starting in state 0 | 0.448 | 1.728e-51 |
|  | Probability of starting in state 1 | 0.196 | 0.211 |
|  | Probability of starting in state 2 | 0.195 | 0.173 |
|  | Probability of starting in state 3 | 0.160 | 0.427 |
|  | Probability of starting in state 4 | -- | 0.190 |
|  | Gamma distribution shape parameter for state 0 | 17.67 | 81742 |
|  | Gamma distribution shape parameter for state 1 | 21.72 | 229.0 |
|  | Gamma distribution shape parameter for state 2 | 4923 | 19.09 |
|  | Gamma distribution shape parameter for state 3 | 336.8 | 19.29 |
|  | Gamma distribution shape parameter for state 4 | -- | 5055 |
|  | Gamma distribution scale parameter for state 0 | 0.139 | 7.526e-5 |
|  | Gamma distribution scale parameter for state 1 | 0.261 | 0.033 |
|  | Gamma distribution scale parameter for state 2 | 0.002 | 0.271 |
|  | Gamma distribution scale parameter for state 3 | 0.023 | 0.124 |
|  | Gamma distribution scale parameter for state 4 | -- | 0.002 |
|  | Gamma distribution mean for state 0 | 2.448 | 6.152 |
|  | Gamma distribution mean for state 1 | 5.674 | 7.581 |
|  | Gamma distribution mean for state 2 | 8.643 | 5.182 |
|  | Gamma distribution mean for state 3 | 7.642 | 2.400 |
|  | Gamma distribution mean for state 4 | -- | 8.646 |
|  | Transition rate from state 0 to 1 | 2.373 | 6.419 |
|  | Transition rate from state 0 to 2 | 1.561 | 5.271 |
|  | Transition rate from state 0 to 3 | 3.263 | 3.628 |
|  | Transition rate from state 0 to 4 | -- | 2.566 |
|  | Transition rate from state 1 to 0 | 1.537 | 0.086 |
|  | Transition rate from state 1 to 2 | 1.351 | 3.798 |
|  | Transition rate from state 1 to 3 | 1.626 | 1.298 |
|  | Transition rate from state 1 to 4 | -- | 1.057 |
|  | Transition rate from state 2 to 0 | 3.036 | 1.997 |
|  | Transition rate from state 2 to 1 | 0.838 | 0.784 |
|  | Transition rate from state 2 to 3 | 3.755 | 3.683 |
|  | Transition rate from state 2 to 4 | -- | 1.679 |
|  | Transition rate from state 3 to 0 | 3.628 | 0.619 |
|  | Transition rate from state 3 to 1 | 3.348 | 3.087 |
|  | Transition rate from state 3 to 2 | 1.283 | 0.777 |
|  | Transition rate from state 3 to 4 | -- | 4.209 |
|  | Transition rate from state 4 to 0 | -- | 1.165 |
|  | Transition rate from state 4 to 1 | -- | 4.681 |
|  | Transition rate from state 4 to 2 | -- | 2.974 |
|  | Transition rate from state 4 to 3 | -- | 3.633 |

Parameter estimates for the two and three hidden disease models were generated using the modified Baum-Welch Expectation Maximization algorithm
